## DEVELOPMENT OF SWIMMING MOVEMENTS AND MUSCULATURE OF LARVAL HERRING (*CLUPEA HARENGUS*)

By R. S. BATTY

*Scottish Marine Biological Association, Dunstaffnage Marine Research  
Laboratory, P.O. Box 3, Oban, Argyll*

*Accepted 20 December 1983*

### SUMMARY

A kinematic analysis was made of swimming of larval herring *Clupea harengus* L. Swimming style was found to change with growth and development; the amplitude of swimming movements of early post-yolk-sac larvae increases linearly towards the tail, a style of swimming which relies mainly on resistive forces for propulsion. Later, after the caudal and dorsal fins have developed, the swimming style changes, in response to an increase in Reynold's Number, such that inertial forces are more important. In this type of swimming the amplitude increases more rapidly than linearly towards the tail.

The distribution of red and white muscle fibre types was studied in relation to development. On hatching, red muscle fibres were found to be arranged as a single layer on the outside of the myotomes. They develop into the adult distribution, concentrated at the midline of the flank near the skin, only after the gills and circulation become fully functional.

### INTRODUCTION

On hatching, larvae of herring (*Clupea harengus*) have elongate eel-like bodies and are 6–8 mm long. During the yolk-sac stage, swimming is probably for depth control (Weihs, 1980*b*) and the amount of time herring larvae spend swimming upwards is correlated with their sinking rate. Once the yolk-sac has been resorbed, larval herring are observed to swim almost continuously at light intensities adequate for feeding (Blaxter & Staines, 1971). This search-swimming has been analysed in anchovy by Hunter (1972) and in plaice by Batty (1981).

There is a very marked scale effect during the growth of a herring larva from 8 mm at hatching to near 40 mm at metamorphosis. Since swimming speed is related to length, Reynold's Number ( $Re$ , which is proportional to the product of length and swimming speed) increases substantially during larval life. The present study examines the changes which occur in swimming style of herring larvae as they grow, relating this to increasing  $Re$  which indicates changes in the importance of inertial over viscous forces.

A method of describing and understanding the swimming movement of a particular

**Key words:** Larval herring, swimming, muscle.

fish is the two-wave model of Gray (1933), further developed by Videler & Wardle (1978). In this model, undulatory swimming is described as a propulsive wave travelling backwards along the body at a velocity  $v$ , wavelength  $\lambda_b$ , and period  $T$ . A further stationary wave with wavelength  $\lambda_s$  describes the track in space followed by a point on the body. The parameters of these two waves can be found by examining the lateral and longitudinal movements of a number of fixed points on the body of the fish (Videler & Wardle, 1978).

Examination of the swimming of plaice larvae (Batty, 1981) shows that larval fish swimming has many similarities to adult swimming previously examined by the model. The main differences are that the swimming speed to wave speed ratio  $u/v$  is lower in larvae than adults and that, at the tail, the maximum value of  $\theta$ , the angle of the body to the direction of motion, is higher and can exceed  $90^\circ$ . The two-wave model does not however consider this angle  $\theta$ , which is a very important factor in the generation of thrust force by the fish's body (Lighthill, 1971).

Search-swimming is powered by aerobic (red) muscles. The amount and location of these aerobic muscles is important in relation to the swimming ability of the fish and the development of its respiration. Walker & Pull (1975) made a survey of the relative proportions of red and white muscle in adult fish but little work has been done on fish larvae. The present study examines the distribution of red muscle of herring larvae from hatching to metamorphosis.

## MATERIALS AND METHODS

### *Source of animals*

Spring-spawning herring were caught on Ballantrae Bank, in the Clyde, Scotland, during early March and the gonads were transported to the laboratory where artificial fertilizations were made. The hatched larvae were reared in circular black plastic tanks of 120–240 l capacity, temperatures rising from about  $8^\circ\text{C}$  to  $14^\circ\text{C}$  during larval life.

### *Body dimensions*

Body dimensions were measured from living anaesthetized larvae using a silhouette photography technique (Edgerton, 1977; Neave & Batty, 1982). The larvae were placed in a container  $75 \times 40 \times 25$  mm made of microscope slides glued with 'Araldite'. It was filled with a filtered anaesthetic-seawater solution (1:40 000 benzocaine) rested on a strip of Kodak fine grain release positive film in a dark room. An electronic flash 2 m from the film was used to make a  $1/1000$  s exposure. The developed films were projected and measurements made of body dimensions at various stages of larval development.

### *Swimming movements*

Swimming larvae were filmed in a small Perspex tank, 15 cm in diameter and 7 cm deep, using a television technique similar to that of Wardle & Reid (1977). A National Panasonic WV3090 television camera with a silicon diode array tube was placed 30 cm above the water. Sharp silhouettes were obtained by using a 'Scotchlite' reflex reflector.

Background beneath the tank with a 15 W strobe light synchronized with the television field pulse. Light from the strobe lamp was reflected off a semi-silvered mirror set at an angle of  $45^\circ$  in front of the camera lens so that the camera lens and illumination shared the same optical axis (see Fig. 1). Video tape recordings were replayed frame-by-frame and analysable sequences copied onto 35 mm film by photographing the individual frames on the monitor screen. These photographs were projected onto a digitizing tablet which was linked to a Hewlett Packard 9825 computer. The outline of each image of a larva from a series of frames (Fig. 2) was entered into the computer and stored as  $x, z$  coordinates,  $x$  being the mean path of motion and  $z$  normal to it in the horizontal plane.

The outline information was transformed, using the method described by Batty (1981), to a series of points on a line along the centre of the larva's back which has values,  $a$ , from 0 at the snout to 1 at the tip of the caudal fin. This co-ordinate system, which defines any point on the centre line of the larva by the three co-ordinates  $a, x, z$  is shown in Fig. 3. A set of 11 points of fixed position on a were calculated using interpolation.

### Histology

Herring larvae were sampled and killed by an overdose of anaesthetic (Benzocaine 1:10 000). Frozen transverse sections were cut in a cryostat and subsequently stained for succinic dehydrogenase (SDHase) to demonstrate the occurrence and distribution of different fibre types. A positive reaction should occur in red aerobic muscle and a negative reaction in white anaerobic muscle. Since the standard method for SDHase staining (Pearse, 1968) failed to demonstrate known red muscle in adult herring satisfactorily, a modified technique was used based on earlier work by Aronson & Pharmakis (1962). This involved using nitroblue tetrazolium with cyanide.

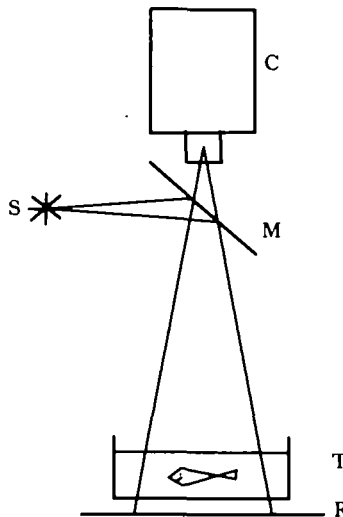

Fig. 1. A diagram showing the apparatus used to record larval swimming movements. C, TV camera; S, strobe lamp (synchronized with TV field pulse); M, semi-silvered mirror; T, small tank containing subjects; R, retro-reflector ('Scotchlite').

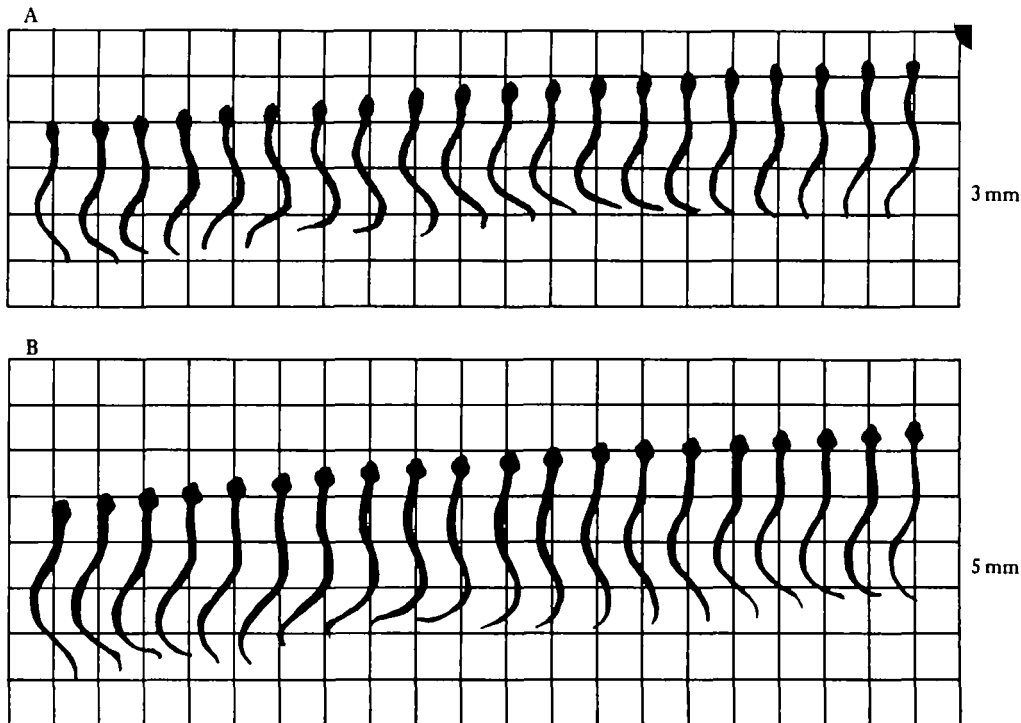

Fig. 2. Outlines of herring larvae swimming. (A) An 11 mm larva; (B) a 22 mm larva; note difference in scale. Frames are 20 ms intervals.

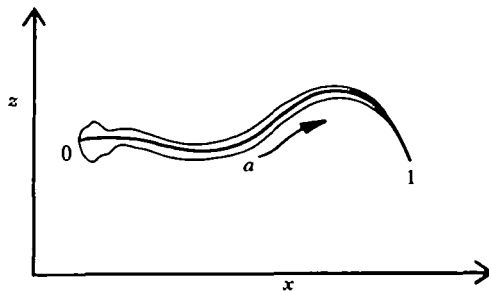

Fig. 3. The three co-ordinates  $x$ ,  $z$  and  $a$  used to describe the movement of any point along the length of the larval body (i.e. along  $a$ ) in terms of  $x$  and  $z$ . Note that  $a$  increases from 0 at the head to 1 at the tail.

The incubation medium was prepared in two parts: solution A consisted of succinate (0.68 g), phenazine methosulphate (2 mg), nitroblue tetrazolium HCl (7 mg) in phosphate buffer ( $0.5 \text{ mol l}^{-1}$ , pH 7.4, 20 ml); solution B, potassium cyanide (10 mg) in phosphate buffer ( $0.5 \text{ mol l}^{-1}$ , pH 7.4, 20 ml). The two solutions were mixed in equal parts on the slide and incubated for 20 min at  $20^\circ\text{C}$ . Controls were pre-incubated for 20 min with a solution of malonate (0.14 g) in phosphate buffer (20 ml). The same slide was then incubated with equal parts of malonate (0.14 g) in solution A (20 ml) and solution B.

Nitroblue tetrazolium is reduced by SDHase, *via* phenazine methosulphate, to form an insoluble formazan which is deposited in the tissue at the site of the reaction and so gives a dark blue stain in the vicinity of the enzyme. Sections were preserved by fixing in 10% phosphate-buffered formalin for 10 min, counter-stained with nuclear fast red, and mounted in an aqueous medium.

## RESULTS

### *Swimming movements*

Swimming speeds of  $5\text{--}20\text{ mm s}^{-1}$  were observed in first feeding larvae about 10 mm long. Swimming speed increased with length, larvae 22 mm long having swimming speeds in the range  $5\text{--}60\text{ mm s}^{-1}$ . Two examples of herring larvae swimming are shown in Fig. 2. The figure shows the outlines of two larvae, of 11 mm and 22 mm length, from successive 20-ms frames of the TV recording. Top views are shown drawn to different scales in order to compare the details of movement. This figure clearly shows apparent similarities between the two larvae. For example there is slightly more than one wavelength on the body at any time, the wave moving along the body with increasing amplitude towards the tail.

Further analysis shows differences in detail between the two sizes of larva. In Fig. 4 amplitude *versus* length curves are shown for the 11 mm and 22 mm larva and also for a 60 mm juvenile herring. The amplitudes of lateral movements,  $z$ , and the maximum value of angle  $\theta$  between the body and the direction of motion, which is the  $x$  axis, are plotted. The shape of both curves is different in the two sizes of larvae. For the 11 mm larva, amplitude and  $\theta_{\max}$  increase almost linearly from head to tail. In contrast, amplitude and  $\theta_{\max}$  in the 22 mm larva increase at a steadily increasing rate from head to tail, and the amplitude is lower at the head and in the anterior part of the body compared with the 11 mm larva. Note that the angle  $\theta_{\max}$  at the tail is less than  $90^\circ$  for the 11 mm larvae but reaches  $100^\circ$  for the 22 mm larva.

In the 22 mm larva the anterior part of the body, for about one-third of its length, is almost rigid. The amplitude *versus* length curve for a juvenile herring (Fig. 4C) shows that the non-linear increase in amplitude is retained after metamorphosis. There is now a considerably greater amplitude at the head however, and the position of minimum amplitude has moved rearwards to between  $0.2$  and  $0.4L$  (where  $L$  is the body length). This indicates that yaw of the head due to lateral recoil is much greater in the juvenile herring than in the larva.

The movement of wave crests of the propulsive wave on the bodies of an 11 mm larva swimming at  $13\text{ mm s}^{-1}$  and a 22 mm larva swimming at  $25\text{ mm s}^{-1}$  are shown in Fig. 5. Note that the fish is swimming along the  $x$  axis from left to right so that wave crests move towards the  $x$  origin. The wave speed is constant along the body of the 11 mm larva (Fig. 5A) and along its direction of motion, the  $x$  axis (Fig. 5B). In the 22 mm larva, the anterior part of the body is rigid, but the wave continues along the rest of the body at a constant speed (Fig. 5C). The speed of the wave along the direction of motion (the  $x$  axis) decreases towards the tail (Fig. 5D) due to the large values of  $\theta$  nearer the tail. The speed of the body wave, along the  $x$  axis, can be expressed as  $v$  for all the body or  $v_p$  for the posterior part only (Batty, 1981).

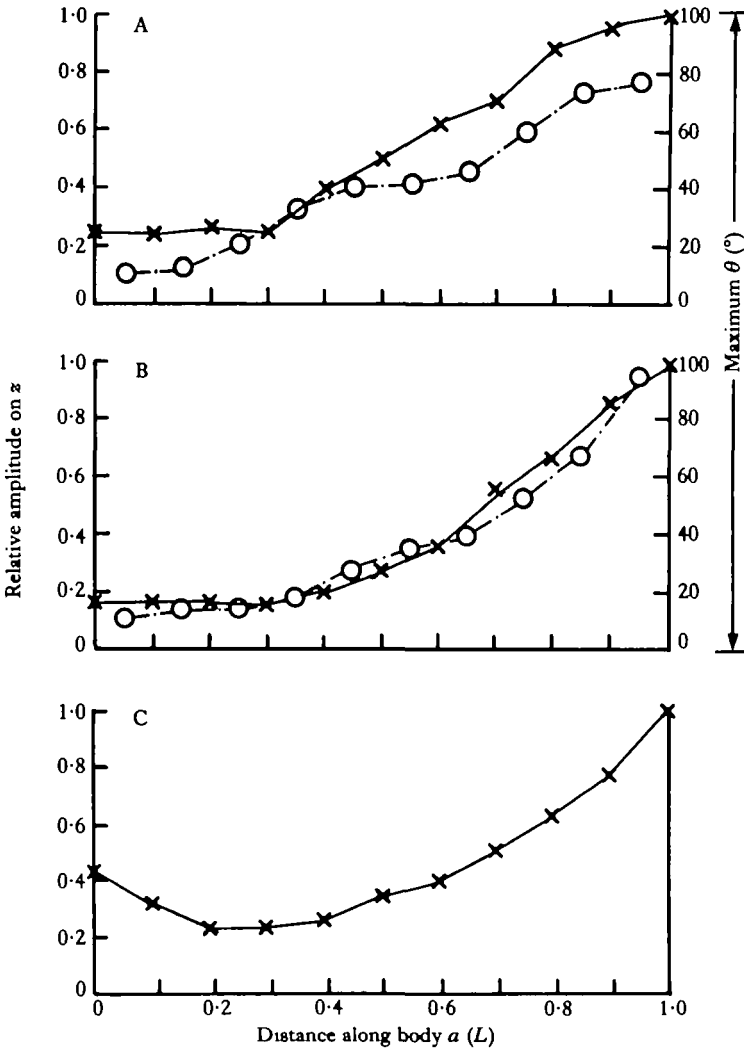

Fig. 4. Maximum relative amplitudes for each length coordinate  $a$  ( $\times$ ), and maximum angle  $\theta$  of each interval between the points shown by the symbol  $\circ$ , (A) for an 11 mm larva; (B) for a 22 mm larva; (C) for a 60 mm juvenile (with the adult form).

The ratio of swimming speed to wave speed  $u/v_p$  is a measure of the slippage of the wave speed in relation to the water. The ratio lies between 0.2 and 0.4 (Fig. 6) which is much lower than that found in adult fish. There is apparently a slightly higher efficiency at faster swimming speeds.

#### *Body dimensions and swimming*

The aspects of body form important for swimming are the lateral profile, the positions of the fins and fineness ratio. Fig. 7 illustrates the change in lateral profile from the eel-like form of the 11 mm larva to the 102 mm juvenile which has the final adult shape. Changes in dimensions of the herring body during growth in length

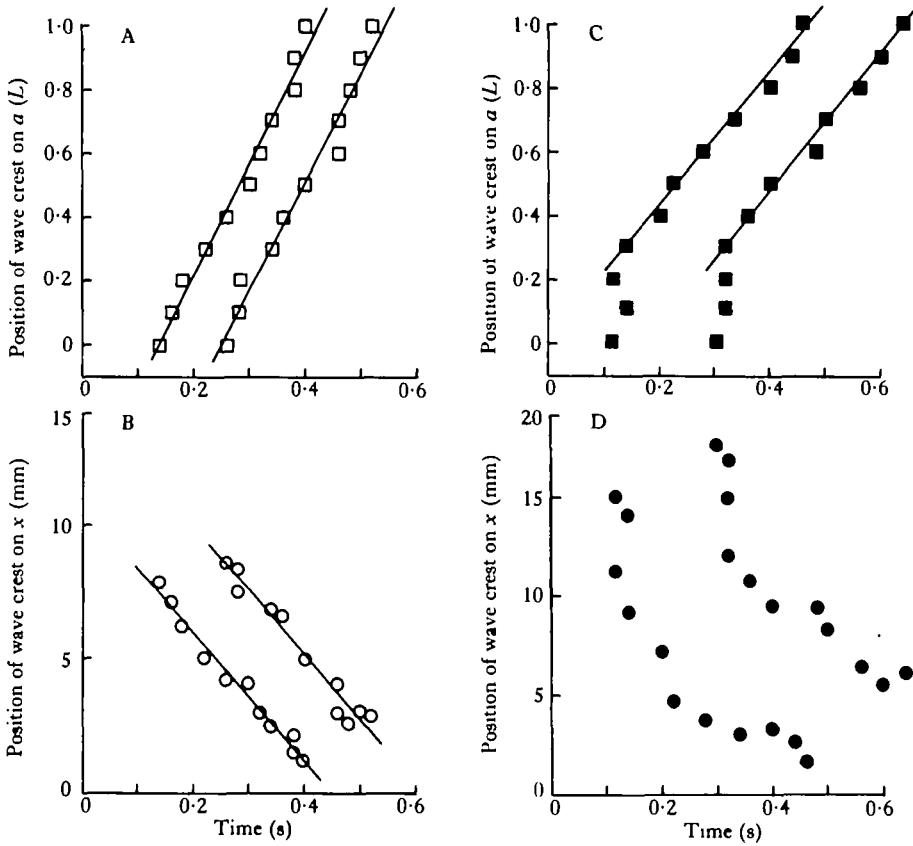

Fig. 5. Wave crest positions against time for an 11 mm larva (A and B) and a 22 mm larva (C and D). Position is shown on the body coordinate  $a$  (A and C) and on the  $x$  coordinate, i.e. direction of motion (B and D).

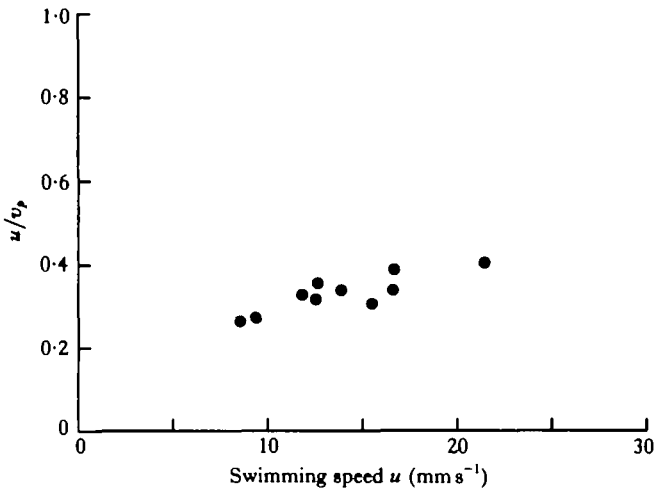

Fig. 6. Ratio of swimming speed to wave speed,  $u/v_p$ , against swimming speed,  $u$ , for a 22 mm larva.

expressed as proportions of length, are shown in Fig. 8. Body depth/ $L$  (Fig. 8) increases as length increases, and the position of maximum height moves forward as the need for a streamlined shape increases. The position of the pectoral fins (Fig. 8D) is initially well forward. The pectoral fins generate lift, initially well ahead of the centre of mass, giving a head-up attitude which has been noted in behavioural observations (Rosenthal, 1968). The head-up attitude is lost as the fish grows and the pectoral fins move relatively rearwards.

The dorsal (Fig. 8C) and anal fins move forward during growth. The dorsal fin develops very early (at about 15 mm length) and is relatively large during larval life. The dorsal fin is too close to the tail to be of use in making turns (Alev, 1958, 1963). This fin, in fact, increases the lateral area behind the centre of mass so tending to increase directional stability (Alev, 1963). The dorsal fin of larval herring is also likely to be important in propulsion. At the end of the caudal fin stroke thrust is low (Wardle & Reid, 1977) and lateral forces relatively large due to a low angle  $\theta$ . The action of the trailing edge of the dorsal fin will tend to smooth the thrust and counteract the recoil produced by the caudal fin, as a result of its opposite lateral movement at the time when the caudal fin produces the maximum lateral force. The effectiveness

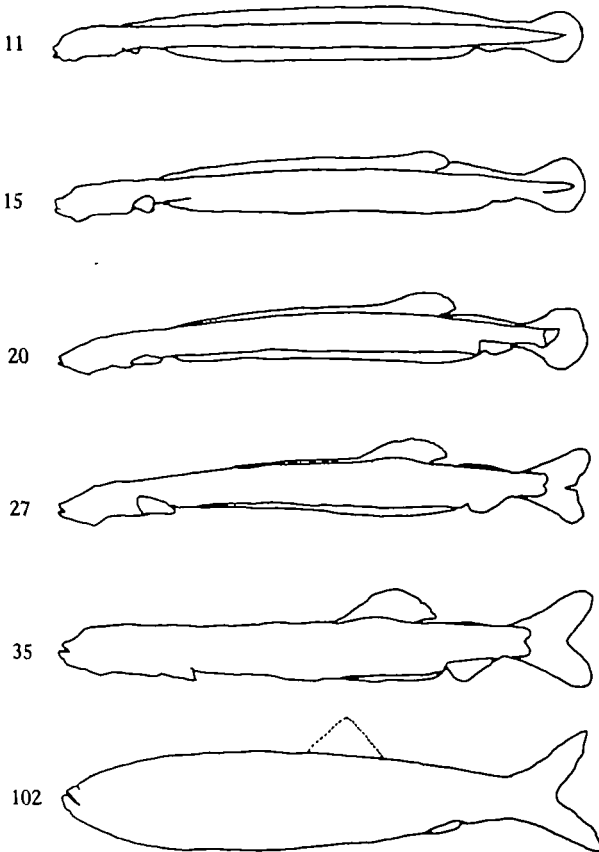

Fig. 7. Outline profiles of herring during growth, drawn to the same size but not the same scale. The length in mm is shown on the left of each drawing. The dorsal fin of the 102 mm juvenile is drawn as a broken line since it can be folded against the body.



This arrangement is apparent when comparing graphs showing amplitude and body position for a 22 mm larva and for a 60 mm juvenile herring (Fig. 4A,B,C). The 22 mm larva is successful in minimizing amplitude near the head caused by lateral recoil. Plaice larvae have similarly small lateral movements of the head (Batty, 1981) but in this species recoil is opposed by pectoral fin movements.

#### Muscle fibres

Transverse sections of herring larvae show two distinct areas in the body muscle,

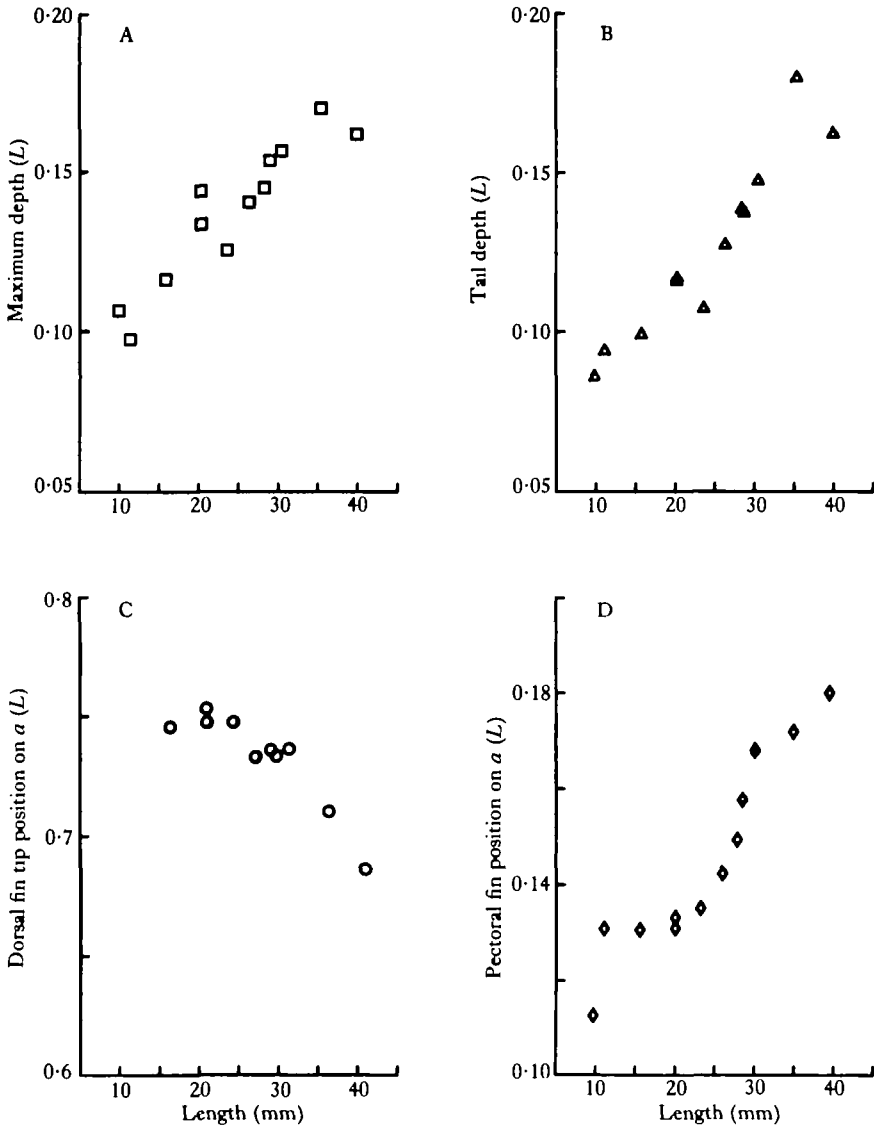

Fig. 8. Changes of important dimensions of herring larvae, during growth in length  $L$ , taken from silhouette photographs of larvae sampled at different stages of development. (A) Maximum body depth/ $L$ ; (B) tail depth/ $L$ ; (C) tip of dorsal fin/ $L$ ; (D) position of pectoral fins/ $L$ .

one of white anaerobic muscle, and the other of red aerobic muscle staining strongly for SDHase (Fig. 9). In the yolk-sac larva (10 mm length, see Fig. 9A), red muscle appears as a band of fibres, one fibre thick, around the external surface of the myotome. This arrangement persists through most of larval life (Fig. 9B,C).

At a length of around 27 mm, the distribution of red muscle begins to change (Fig. 9D). Between the band of red muscle and the skin are a number of new muscle fibres which stain well for SDHase but do not exhibit such a strong reaction as the original red fibres. As these fibres increase in proportion the staining reaction becomes more uniform. The red and white muscle distribution typical of adults is observed in the 35 mm fish (Fig. 9E) and here, on the basis of SDHase staining, only these two types of muscle can be recognized.

The change in the relative proportions of red and white muscle during growth of herring larvae was measured by finding their relative areas in camera lucida drawings of transverse sections. To make comparisons with the work of Walker & Pull (1975) all the sections used for this were taken from a point one-third of the length along the body from the tail ( $a = 0.67$ ). The graph of red muscle area in transverse section (Fig. 10) shows a decline in the proportion of red muscle from 13% at the end of the yolk-sac stage to a minimum of about 8% at a length of about 30 mm. In the juvenile fish, after the full development of gills and circulation, it has increased to about 16% at 70 mm length, the same proportion found by Walker & Pull (1975) for adult herring. The minimum in red muscle bulk nearly coincides with the changeover in the distribution of the red muscle from the larval single fibre band to the adult arrangement concentrated about the centre of the myotomes near the skin.

#### DISCUSSION

During growth a fish larva experiences a great change in the nature of the water flow about its body whilst swimming. This is due to a scale effect of growth and increase in the swimming speed used for searching. In larval herring the swimming movements change as Reynolds Number ( $Re$ ) increases during growth. The shape of the amplitude against length curve (Fig. 4) changes as herring larvae grow. Initially (at 11 mm length) it is linear, but once larvae have grown to 22 mm it becomes non-linear. Amplitude then increases more rapidly as the tail is approached. The shape of this curve is characteristic of the type of swimming motion employed (Grillner & Kashin, 1976; Videler, 1981). A linear increase in amplitude along the body, giving a large amplitude over most of the length of the body, is characteristic of a style of swimming in which lateral acceleration of water is constant along the body, indicating that resistive forces are important. The non-linear increase in amplitude seen in a 22 mm larva (Fig. 4B) is typical of a style of swimming which is often called carangiform or subcarangiform; in this mode lateral acceleration of water by the fish body increases rapidly towards the tail, so that in this type of swimming reactive (inertial) forces predominate.

Fig. 9. Photomicrographs of transverse sections of herring larvae stained for SDHase. Dark areas indicate a positive reaction. (A) 10 mm yolk-sac larva; (B) 11.5 mm larva; (C) 25 mm larva; (D) 27 mm larva at centre of myotome; (E) 35 mm metamorphosing fish. Scale bars: A, B, D = 50  $\mu\text{m}$ ; C, E = 500  $\mu\text{m}$ .

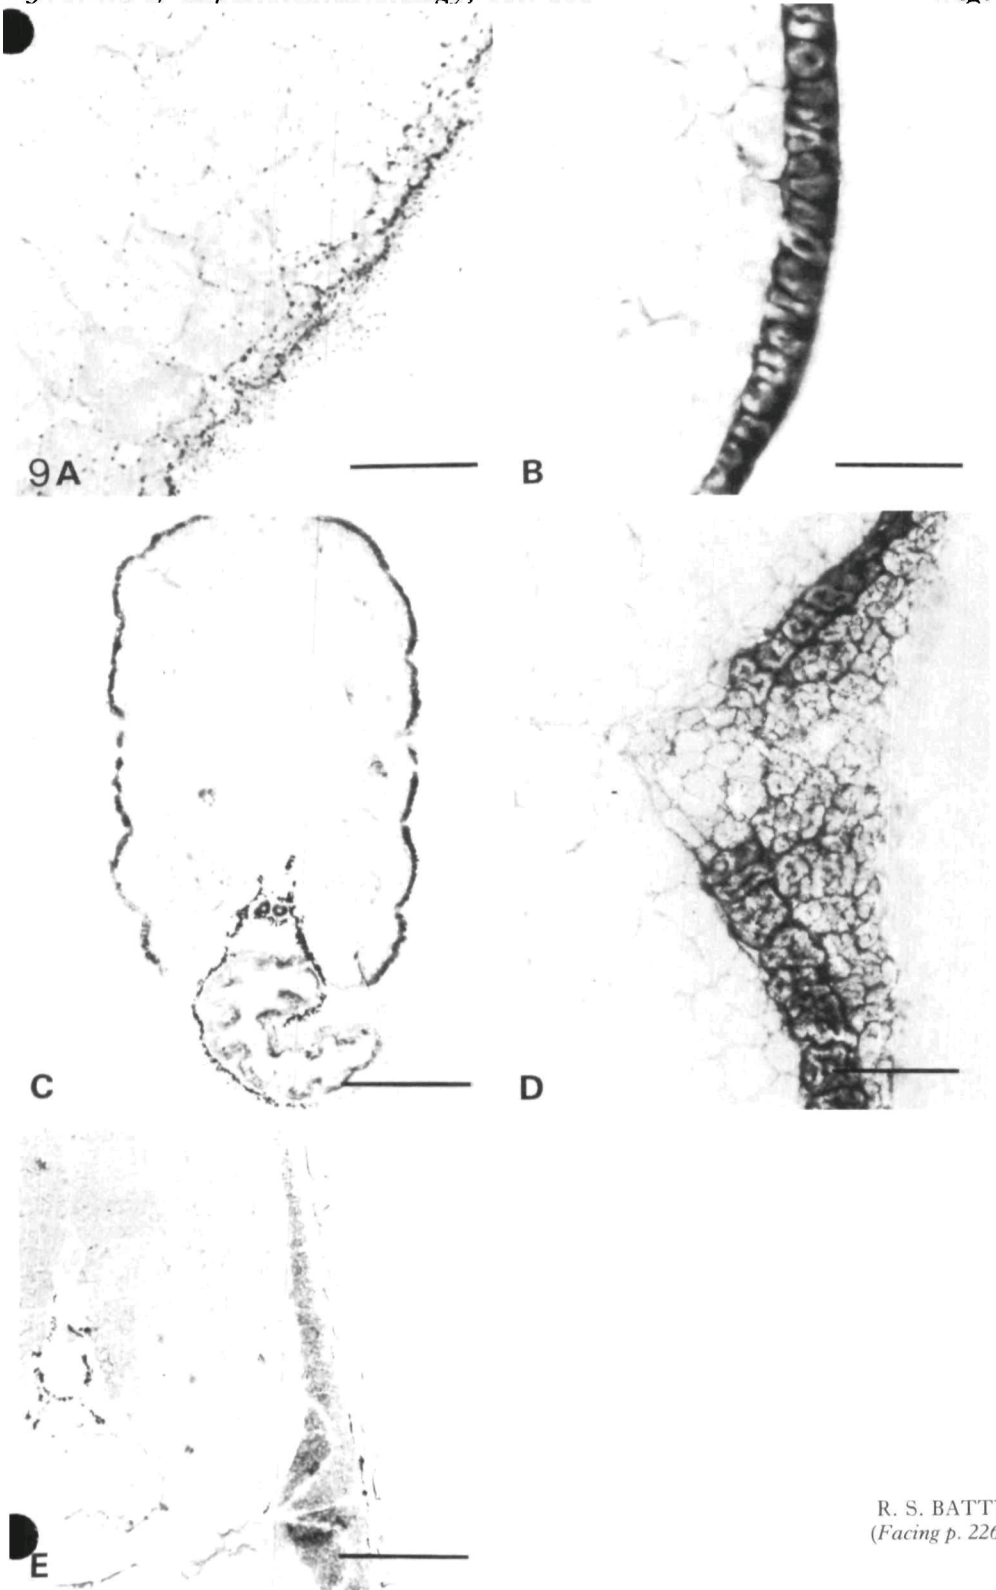

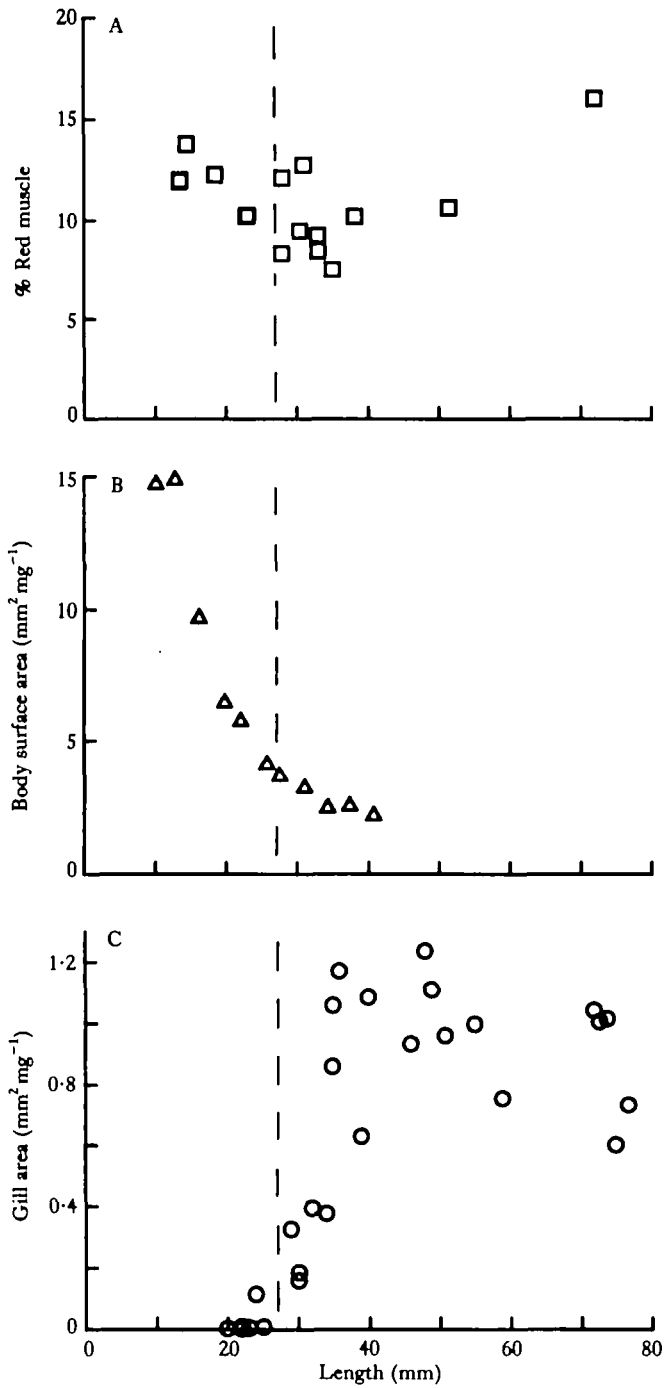

Fig. 10. (A) Changes in the proportion of red muscle, at  $a = 0.67$ ; (B) body surface area to body mass ratio; and (C) gill surface area to body mass ratio, all plotted against length. Parts B and C use data taken from de Silva (1973). The vertical dashed line at 27 mm shows the length at which the adult distribution of red muscle starts to develop.

Weih's (1980a) showed theoretically that the swimming style of anchovy larvae changed as they grew, due to the increase of  $Re$ , so that intermittent swimming became energetically more advantageous as viscous forces became less important. Weih's (1980a) defined three regimes:  $Re < 10$ , where velocity is much more important than inertial force effects,  $10 < Re < 200$ , which is a region of transition where the flow changes from the viscous regime to the inertial regime, where  $Re > 200$ . In low  $Re$  regimes, drag coefficient is inversely related to  $Re$  which makes swimming at low speeds very inefficient. This will affect herring larvae in the yolk-sac stage and during the early stages of feeding. Until the larva exceeds a length of 15 mm and the  $Re$  at the searching speed of the larva has exceeded 200, swimming using reactive forces would be very inefficient. It is therefore advantageous for herring larvae less than 15 mm to use resistive thrust production. The appearance of the caudal and dorsal fins when the larvae are between 15 mm and 20 mm in length increases the effectiveness of swimming in this mode and the change in swimming style occurs at the same size.

A distribution of red aerobic muscle fibres similar to that reported here has been described in larval zebra fish, *Brachydanio rerio*, by Waterman (1969) using SDHase staining and by Van Raamsdonk, Pool & te Kronnie (1978) using immunological techniques. Both studies showed a single layer of red fibres in newly hatched larvae, developing to an adult distribution similar to that of adult herring.

The development of respiration in herring larvae was studied by de Silva (1973, 1974). Her results for gill and body surface area are plotted in Fig. 10, together with the percentage of red muscle. A vertical dashed line indicates the body length at which the adult distribution of red muscle fibres starts to develop. The gills develop very rapidly from a length of 22 mm onwards, the most rapid development occurring at around 30 mm. The maximum gill area to body weight ratio attained was  $1.2 \text{ mm}^2 \text{ mg}^{-1}$  at metamorphosis (length 35–40 mm). It thus appears that cutaneous respiration is more important than gill respiration during most of the larval stage. Gill respiration only becomes important when the gill area has increased at a body length of 25 mm. Up to this length, the red muscle is distributed peripherally, enabling it to utilize cutaneous respiration. Subsequently, new red fibres appear away from the periphery but by this time gill respiration has been established.

I thank J. H. S. Blaxter, D. A. Booth, R. Harvey, J. J. Videler and C. S. Wardle for their comments on the manuscript. The work was carried out while I was in receipt of a NERC research studentship.

#### REFERENCES

- ALEEV, YU. G. (1958). Adaptation for movement and the turning ability of fish. *Dokl. Biol. Sci.* (Transl.) **120**, 299–302.
- ALEEV, YU. G. (1963). *Function and Gross Morphology in Fish*. Moscow. (Transl. from Russian, Isr. Program. Sci. Transl. No. 1773, Jerusalem, 1969).
- ARONSON, W. & PHARMAKIS, T. (1962). Enhancement of neotetrazoleum staining for succinic dehydrogenase activity with cyanide. *Stain Technology* **37**, 321.
- BATTY, R. S. (1981). Locomotion of plaice larvae. *Symp. zool. Soc. Lond.* **48**, 53–69.
- BLAXTER, J. H. S. & STAINES, M. E. (1971). Food searching potential in marine fish larvae. In *Fourth European Marine Biology Symposium*, (ed. D. J. Crisp), pp. 467–485. London: Cambridge University Press.

- SILVA, C. D. (1973). The ontogeny of respiration in herring and plaice larvae. Ph.D. thesis. Stirling University.
- DE SILVA, C. D. (1974). Development of the respiratory system in herring and plaice larvae. In *The Early Life History of Fish*, (ed. J. H. S. Blaxter), pp. 465–485. Berlin: Springer Verlag.
- EDGERTON, H. E. (1977). Silhouette photography of small active subjects. *J. Microscopie* **110**, 79–81.
- GRAY, J. (1933). The movement of fish with special reference to the eel. *J. exp. Biol.* **10**, 88–104.
- GRILLNER, S. & KASHIN, S. (1976). On the generation and performance of swimming in fish. In *Neural control of locomotion*, (eds R. M. Herman, S. Grillner, P. S. G. Stein & D. G. Stuart), pp. 181–201. New York: Plenum Press.
- HUNTER, J. R. (1972). Swimming and feeding behaviour of larval anchovy *Engraulis mordax*. *Fishery Bull. Fish Wildl. Serv. U.S.* **70**, 821–838.
- LIGHTHILL, M. J. (1971). Large-amplitude elongated-body theory of fish locomotion. *Proc. R. Soc. B.* **179**, 125–138.
- NEAVE, D. A. & BATTY, R. S. (1982). A simple method for measuring fish larvae using silhouette photography. *Aquaculture* **29**, 165–168.
- PEARSE, A. G. E. (1968). *Histochemistry, Theoretical and Applied*. Vol. 1. 759pp. London: Churchill.
- ROSENTHAL, H. (1968). Schwimmverhalten und schwimmgeschwindigkeit bei den Larven des Herrings *Clupea harengus*. *Helgoländer wiss. Meeresunters* **18**, 453–486.
- VAN RAAMSDONK, W., POOL, C. W. & TE KRONNIE, G. (1978). Differentiation of muscle fiber types in the teleost *Brachydanio rerio*. *Anat. Embryol.* **153**, 137–155.
- VIDELER, J. J. (1981). Swimming movements, body structure and propulsion in cod *Gadus morhua*. *Symp. Zool. Soc. Lond.* **48**, 1–27.
- VIDELER, J. J. & WARDLE, C. S. (1978). New kinematic data from high speed cine film recordings of swimming cod (*Gadus morhua*). *Neth. J. Zool.* **28**, 465–484.
- WALKER, M. G. & PULL, G. A. (1975). A survey of red and white muscle in marine fish. *J. Fish Biol.* **7**, 295–300.
- WARDLE, C. S. & REID, A. (1977). The application of large amplitude elongated body theory to measure swimming power in fish. In *Fisheries Mathematics*, (ed. J. H. Steele), pp. 171–191. London: Academic Press.
- WATERMAN, R. E. (1969). Development of the lateral musculature in the teleost, *Brachydanio rerio*: A fine structural study. *Am. J. Anat.* **125**, 457–494.
- WEIHS, D. (1980a). Energetic significance of changes in swimming modes during growth of larval anchovy *Engraulis mordax*. *Fishery Bull. Fish Wildl. Serv. U.S.* **77**, 597–604.
- WEIHS, D. (1980b). Respiration and depth control as possible reasons for swimming of northern anchovy, *Engraulis mordax*, yolk-sac larvae. *Fishery Bull. Fish Wildl. Serv. U.S.* **78**, 109–117.
